# Supplementary material for: Glancing angle deposition of large-scale helical Si@Cu3Si nanorod arrays for high-performance anodes in rechargeable Li-ion batteries
Source: Royal Society of Chemistry journal article supplement (doi:10.1039/d1nr05297g), 2021-01-01
Supplement: d1nr05297g1.pdf [file d1nr05297g1.pdf]

## Supporting Information

### **Glancing Angle Deposition of Large-Scale Helical Si@Cu<sub>3</sub>Si Nanorod Arrays for High-Performance Anodes in Rechargeable Li-Ion Batteries**

Hsiao-Chien Wang<sup>1,3,4#</sup>, Chih-Ming Hsu<sup>1,3,4#</sup>, Bingni Gu<sup>1,3,4</sup>, Chia-Chen Chung<sup>1,3,4</sup>, Shu-Chi Wu<sup>1,3,4</sup>, P.

Robert Ilango<sup>1</sup>, Jian-Shiou Huang<sup>2</sup>, Wen-Chun Yen<sup>2</sup>, and Yu-Lun Chueh<sup>1,3,4\*</sup>

<sup>1</sup>Department of Materials Science and Engineering, National Tsing-Hua University, 30013, Taiwan.

<sup>2</sup>Giga Solar Materials Corporation, Hsinchu 303.Taiwan.

<sup>3</sup>Frontier Research Center on Fundamental and Applied Sciences of Matters, National Tsing Hua University, Hsinchu 30013, Taiwan.

<sup>4</sup>Department of Physics, National Sun Yat-Sen University, Kaohsiung, 80424, Taiwan.

**Table S1** The double layer capacitance ( $C_{dl}$ ) and the relative surface areas of the helical Si hierarchical nanostructures.

| Samples | Capacitance<br>( $\mu\text{F cm}^{-3}$ ) | Relative Surface<br>area |
|---------|------------------------------------------|--------------------------|
| Si-3    | 0.112                                    | 1                        |
| Si-9    | 0.121                                    | 1.08                     |
| Si-12   | 0.178                                    | 1.59                     |
| Si-48   | 0.208                                    | 1.86                     |

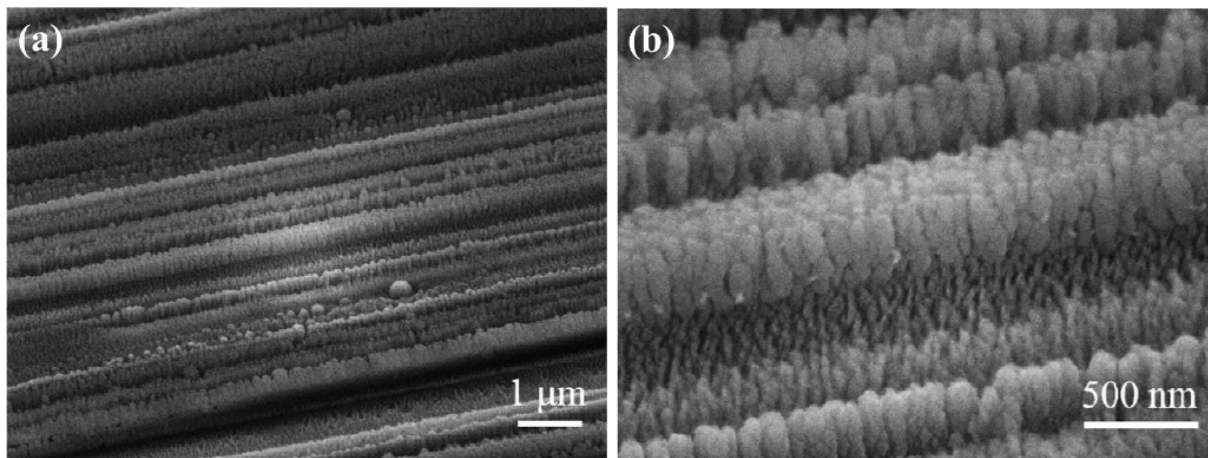

**Figure S1** SEM images of the Si hierarchical nanostructures on the Cu foil.

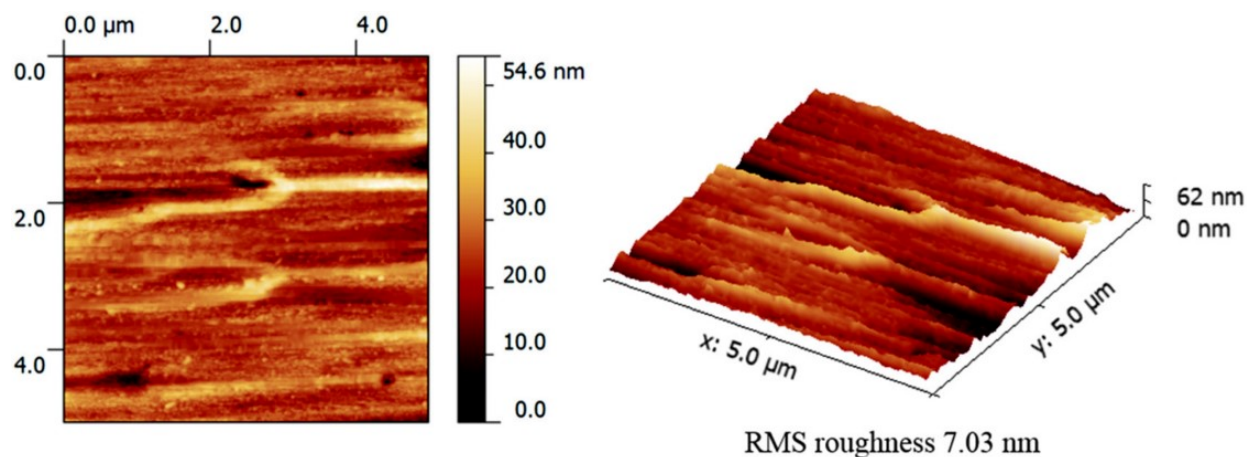

**Figure S2** Surface roughness of the stainless steel

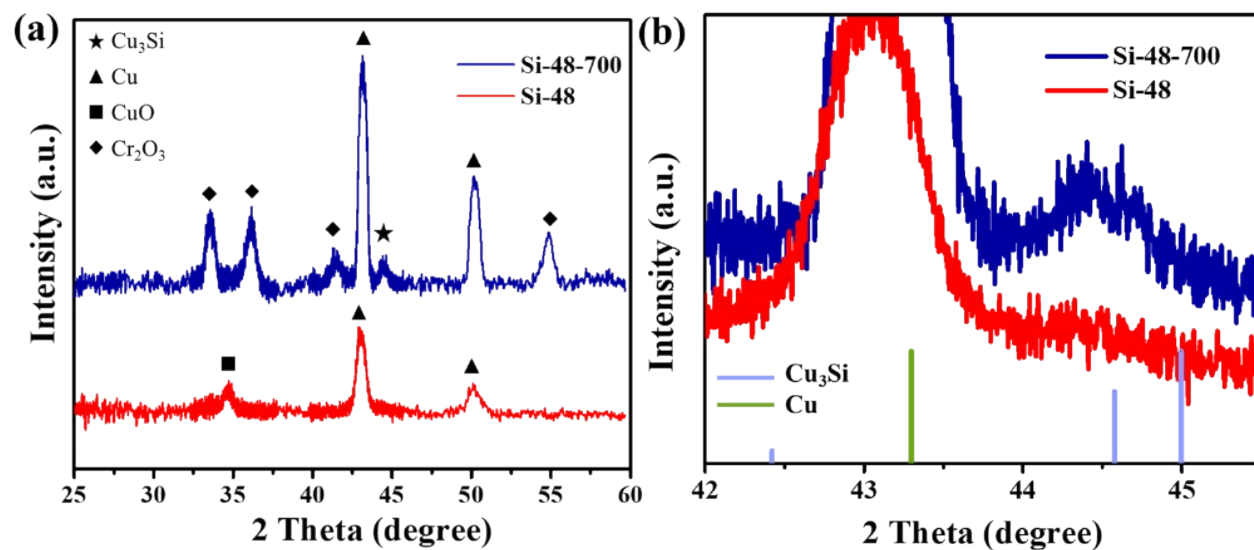

**Figure S3** (a) XRD patterns and (b) enlarged XRD patterns ranging from  $42^\circ$  to  $45.5^\circ$  of Si-48 and Si-48-700 via synchrotron radiation X-ray diffraction techniques. The XRD peaks have been indexed according to JCPDS no. 51-0916 ( $\text{Cu}_3\text{Si}$ ), no.03-1018 (Cu), no.045-937 (CuO), no.38-1479 ( $\text{Cr}_2\text{O}_3$ ). Actually, Cu could easily oxide in air condition, so there was a peak located at  $35.5^\circ$  and corresponding to the crystalline planes of Cu (002). Moreover, Cr in the stainless steel segregated on the surface and formed into  $\text{Cr}_2\text{O}_3$  after annealing.

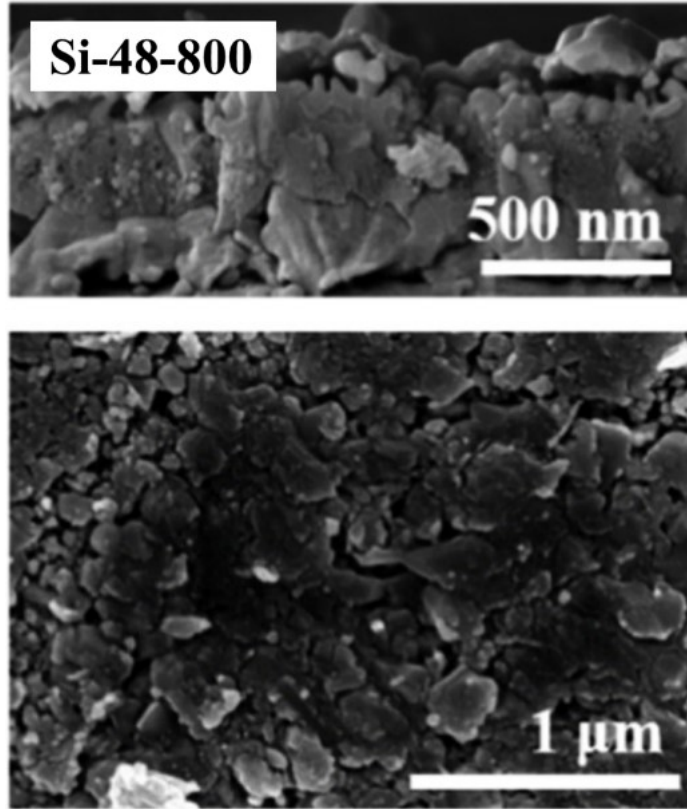

Figure S4 SEM images of the Si-48-800 materials.

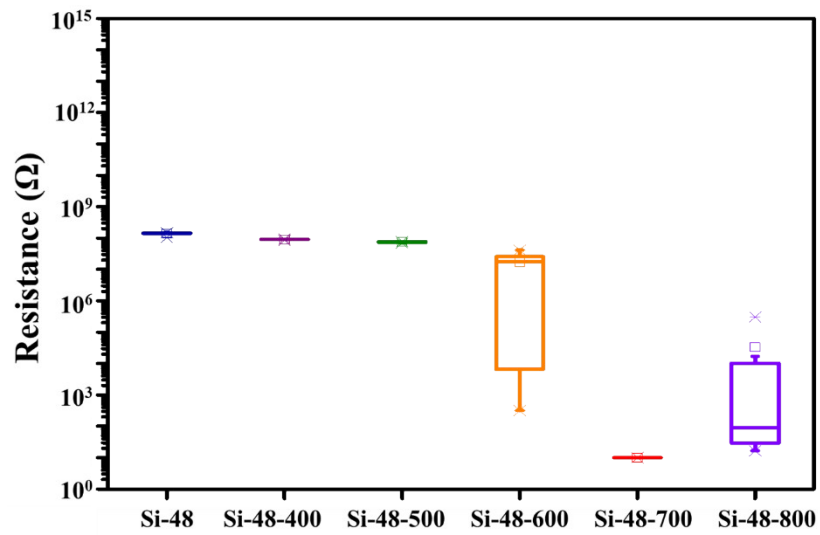

Figure S5 Resistance of the as-prepared Si-based materials.

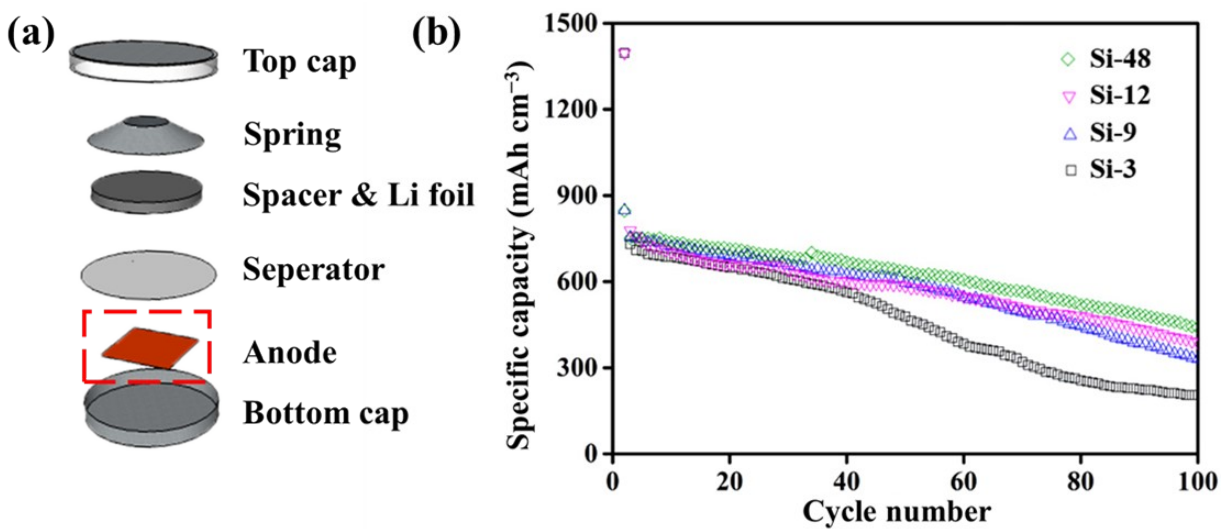

**Figure S6** (a) A coin-cell type battery. (b) Discharge capacity of the hierarchical Si materials at a rate of 0.25 C.

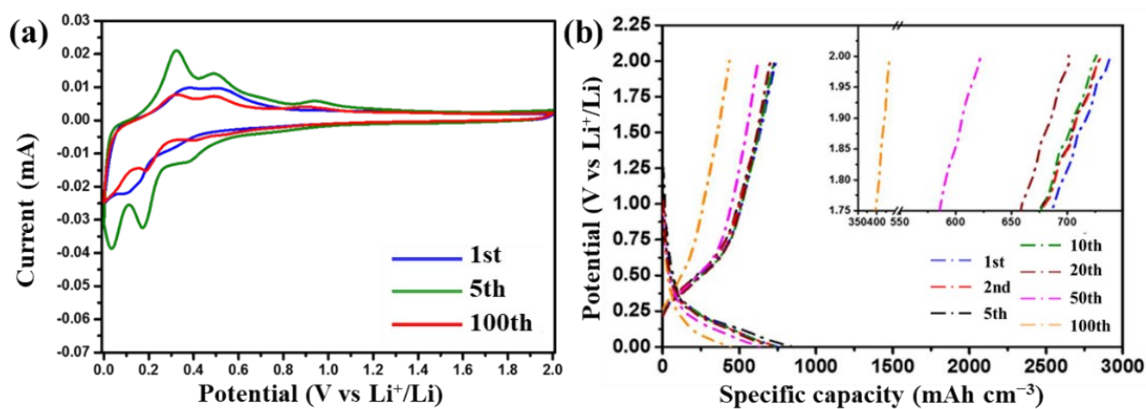

**Figure S7** (a) CV curves of the intrinsic Si-48 materials at a scan rate of  $0.1 \text{ mV s}^{-1}$ . (b) Charge-discharge curves of the intrinsic Si-48 materials at a rate of 0.25 C.

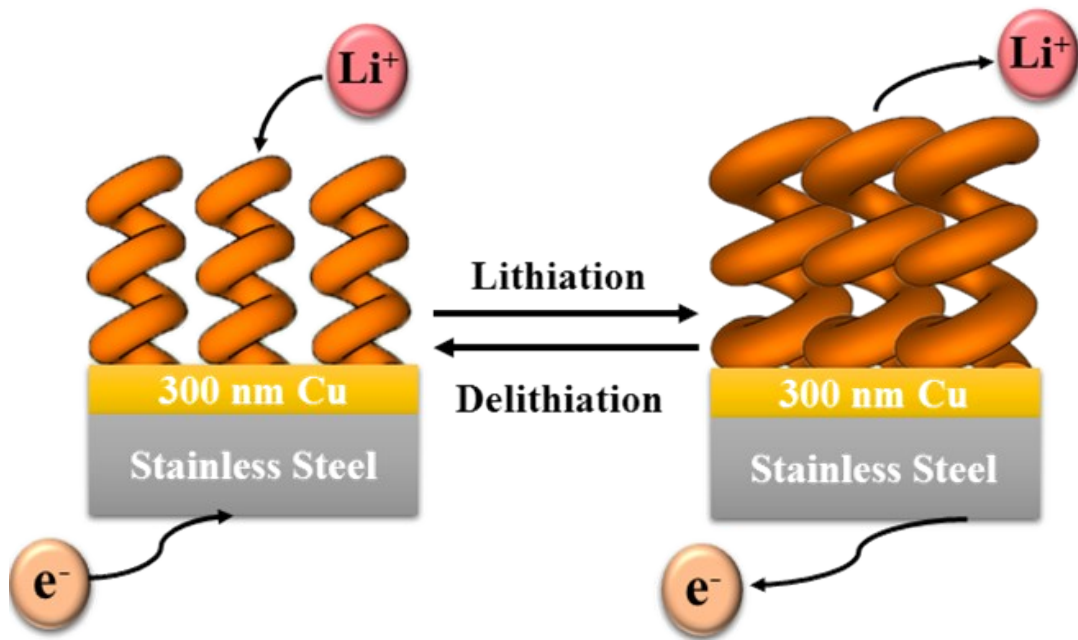

**Figure S8** Illustration of Si-based electrode during charge and discharge process.

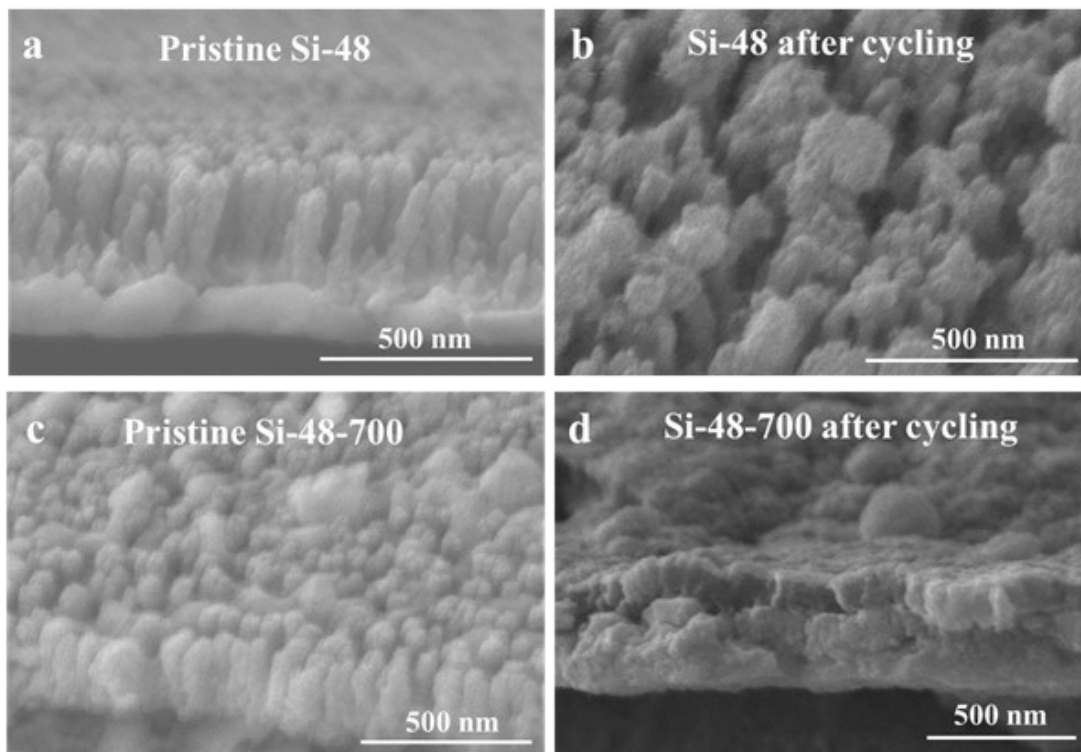

**Figure S9** SEM images of Si-48 and Si-48-700 anodes before and after cycling.
